# Supplementary material for: Structural mechanism for regulation of the AAA-ATPases RUVBL1-RUVBL2 in the R2TP co-chaperone revealed by cryo-EM
Source: PubMed Central journal article supplement (PMC6494491; doi:10.1126/sciadv.aaw1616), 2019-05-01
Supplement: aaw1616_SM.pdf [file aaw1616_SM.pdf]

## Supplementary Materials for

### **Structural mechanism for regulation of the AAA-ATPases RUVBL1-RUVBL2 in the R2TP co-chaperone revealed by cryo-EM**

Hugo Muñoz-Hernández, Mohinder Pal, Carlos F. Rodríguez, Rafael Fernandez-Leiro, Chrisostomos Prodromou, Laurence H. Pearl, Oscar Llorca\*

\*Corresponding author. Email: [olorca@cniio.es](mailto:olorca@cniio.es)

Published 1 May 2019, *Sci. Adv.* **5**, eaaw1616 (2019)  
DOI: 10.1126/sciadv.aaw1616

#### **The PDF file includes:**

Table S1. Primers used for cloning in this work.

Table S2. Conditions used for cryo-EM data collection for all the cryo-EM maps in this work.

Table S3. Cryo-EM data refinement and validation statistics for all the cryo-EM maps in this work.

Table S4. Validation statistics for the atomic models for R2TP- $\Delta$ NT\_structure3 and R2TP- $\Delta$ NT\_structure4.

Fig. S1. Cryo-EM of truncated human R2TP (R2TP- $\Delta$ NT).

Fig. S2. Resolution estimation for cryo-EM structures obtained from the subtracted particles.

Fig. S3. High-resolution details in the cryo-EM maps.

Legends for movies S1 and S2

#### **Other Supplementary Material for this manuscript includes the following:**

(available at [advances.sciencemag.org/cgi/content/full/5/5/eaaw1616/DC1](https://advances.sciencemag.org/cgi/content/full/5/5/eaaw1616/DC1))

Movie S1 (.mov format). Several views of the multibody refinement strategy, showing the motions of the PIH1D1 region bound to a DII domain of RUVBL2, with respect to the rest of the molecule.

Movie S2 (.mp4 format). Conformational changes in the RUVBL2 subunit, from a closed conformation to an open ADP-filled conformation to an open ADP-empty conformation.

**Table S1. Primers used for cloning in this work.**

|                      | Primer 5'-3'                      |
|----------------------|-----------------------------------|
| RPAP3 400<br>Forward | GGTCATTGGGATGACGTGTTCTG           |
| RPAP3 665<br>reverse | TTAACCGCCGTAGCGTTTTTTCAGTTCTTCGAC |

**Table S2. Conditions used for cryo-EM data collection for all the cryo-EM maps in this work.**

|                                             |                                                              |
|---------------------------------------------|--------------------------------------------------------------|
| <b>Cryo-EM access codes</b>                 | (EMD-4552, EMD-4553, EMD-4554, EMD-4555, EMD-4556, EMD-4557) |
| <b>Data collection (for all structures)</b> |                                                              |
| Microscope                                  | FEI Titan Krios                                              |
| Detector                                    | Gatan K2 (counting mode)                                     |
| Calibrated magnification                    | 130000                                                       |
| Voltage (kV)                                | 300                                                          |
| Electron exposure (e-/Å <sup>2</sup> )      | 47.5 (40 fractions)                                          |
| Defocus range (µm)                          | -1.5 to -2.5                                                 |
| Pixel size (Å)                              | 1.07                                                         |

**Table S3. Cryo-EM data refinement and validation statistics for all the cryo-EM maps in this work.**

|                                                  |            |
|--------------------------------------------------|------------|
| <b>Processing (R2TP-ΔNT_structure1)</b>          | (EMD-4554) |
| Symmetry imposed                                 | C1         |
| Initial particle images (no.)                    | 408781     |
| Final particle images (no.)                      | 136414     |
| FSC threshold                                    | 0.143      |
| Map resolution (Å)                               | 3.97       |
| Map resolution range (Å)                         | 3.0-20.0   |
| Map sharpening <i>B</i> factor (Å <sup>2</sup> ) | -150.95    |
| <b>Processing (R2TP-ΔNT_structure2)</b>          | (EMD-4555) |
| Symmetry imposed                                 | C1         |

|                                                  |                            |
|--------------------------------------------------|----------------------------|
| Initial particle images (no.)                    | 408781                     |
| Final particle images (no.)                      | 103427                     |
| FSC threshold                                    | 0.143                      |
| Map resolution (Å)                               | 3.97                       |
| Map resolution range (Å)                         | 3.0-20.0                   |
| Map sharpening <i>B</i> factor (Å <sup>2</sup> ) | -130.504                   |
| <b>Processing (R2TP-<br/>ΔNT_structure3)</b>     | (EMD-4552, PDB ID<br>6QI8) |
| Symmetry imposed                                 | C1                         |
| Initial particle images (no.)                    | 408781                     |
| Final particle images (no.)                      | 102100                     |
| FSC threshold                                    | 0.143                      |
| Map resolution (Å)                               | 3.75                       |
| Map resolution range (Å)                         | 3.0-10.0                   |
| Map sharpening <i>B</i> factor (Å <sup>2</sup> ) | -140.711                   |
| <b>Processing (R2TP-<br/>ΔNT_structure4)</b>     | (EMD-4553, PDB ID<br>6QI9) |
| Symmetry imposed                                 | C1                         |
| Initial particle images (no.)                    | 408781                     |
| Final particle images (no.)                      | 33466                      |
| FSC threshold                                    | 0.143                      |
| Map resolution (Å)                               | 4.63                       |
| Map resolution range (Å)                         | 3.0-10.0                   |
| Map sharpening <i>B</i> factor (Å <sup>2</sup> ) | -166.426                   |
| <b>Processing (R2TP-<br/>ΔNT_structure5)</b>     | (EMD-4556)                 |
| Symmetry imposed                                 | C1                         |
| Initial particle images (no.)                    | 408781                     |
| Final particle images (no.)                      | 102100                     |
| FSC threshold                                    | 0.143                      |
| Map resolution (Å)                               | 3.97                       |
| Map resolution range (Å)                         | 3.0-10.0                   |
| Map sharpening <i>B</i> factor (Å <sup>2</sup> ) | -147.472                   |
| <b>Processing (R2TP-<br/>ΔNT_structure6)</b>     | (EMD-4557)                 |
| Symmetry imposed                                 | C1                         |
| Initial particle images (no.)                    | 408781                     |
| Final particle images (no.)                      | 33466                      |
| FSC threshold                                    | 0.143                      |
| Map resolution (Å)                               | 5.15                       |

|                                                  |          |
|--------------------------------------------------|----------|
| Map resolution range (Å)                         | 3.0-10.0 |
| Map sharpening <i>B</i> factor (Å <sup>2</sup> ) | -190.506 |

**Table S4. Validation statistics for the atomic models for R2TP-ΔNT\_structure3 and R2TP-ΔNT\_structure4.**

|                                                  |                          |
|--------------------------------------------------|--------------------------|
| <b>Refinement R2TP-ΔNT_structure3</b>            | (EMD-4552, PDB ID 6QI8)  |
| Refinement software                              | phenix.real_space_refine |
| Initial model used (PDB code)                    | 6FO1                     |
| Map sharpening <i>B</i> factor (Å <sup>2</sup> ) | -140.711                 |
| Model composition                                |                          |
| Non-hydrogen atoms                               | 14789                    |
| Protein residues                                 | 1907                     |
| Ligands                                          | 6 ADP                    |
| <i>B</i> factors (Å <sup>2</sup> )               |                          |
| Average                                          | 39.69                    |
| R.m.s. deviations                                |                          |
| Bond lengths (Å)                                 | 0.004                    |
| Bond angles (°)                                  | 0.9                      |
| Validation                                       |                          |
| MolProbity score                                 | 1.53                     |
| Clashscore                                       | 3.66                     |
| Poor rotamers (%)                                | 0.13                     |
| Cbeta outliers (%)                               | 0                        |
| Ramachandran plot                                |                          |
| Favored (%)                                      | 94.51                    |
| Allowed (%)                                      | 5.49                     |
| Disallowed (%)                                   | 0                        |
| Mask CC                                          | 0.82                     |
| <b>Refinement R2TP-ΔNT_structure4</b>            | (EMD-4553, PDB ID 6QI9)  |
| Refinement software                              | phenix.real_space_refine |
| Initial model used (PDB code)                    | 6FO1                     |
| Map sharpening <i>B</i> factor (Å <sup>2</sup> ) | -166.426                 |
| Model composition                                |                          |
| Non-hydrogen atoms                               | 14559                    |
| Protein residues                                 | 1879                     |
| Ligands                                          | 5 ADP                    |
| <i>B</i> factors (Å <sup>2</sup> )               |                          |

|                    |        |
|--------------------|--------|
| Average            | 167.88 |
| R.m.s. deviations  |        |
| Bond lengths (Å)   | 0.007  |
| Bond angles (°)    | 1.082  |
| Validation         |        |
| MolProbity score   | 2.05   |
| Clashscore         | 10.33  |
| Poor rotamers (%)  | 0.39   |
| Cbeta outliers (%) | 0      |
| Ramachandran plot  |        |
| Favored (%)        | 91.01  |
| Allowed (%)        | 8.99   |
| Disallowed (%)     | 0      |
| Mask CC            | 0.74   |

**SUPPLEMENTARY FIGURES**

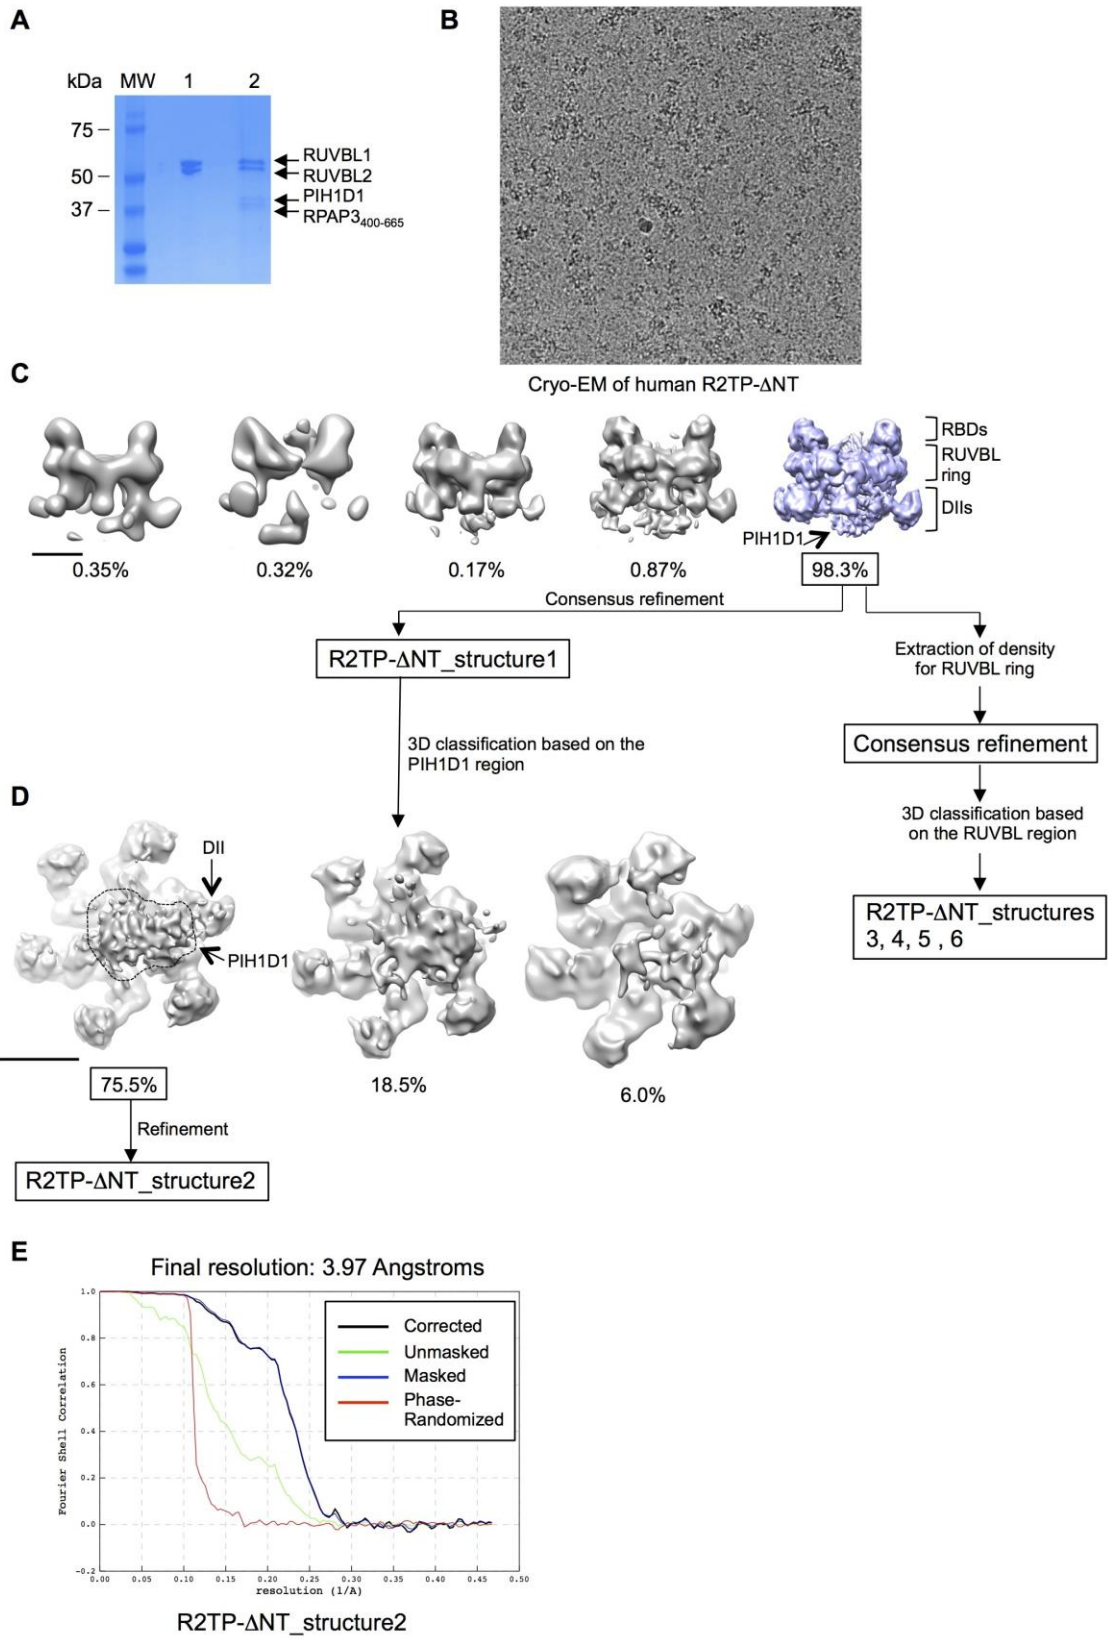

**Fig. S1. Cryo-EM of truncated human R2TP (R2TP- $\Delta$ NT).** (A) Strep-pull down experiment showing the interaction between RUVBL1-RUVBL2 and RPAP3<sub>400-665</sub>-PIH1D1. MW stands for molecular weight markers. Lane 1 shows the RUVBL1-RUVBL2 complex containing a strep-tagged RUVBL2 subunit, only used for this experiment. The RPAP3<sub>400-665</sub>-PIH1D1 complex is the same as in Fig. 1b. Lane 2 shows the material eluted from the beads. RPAP3<sub>400-665</sub>-PIH1D1 binds to RUVBL1-RUVBL2. For cryo-EM, the ratio of RPAP3<sub>400-665</sub>-PIH1D1 versus RUVBL1-RUVBL2 was increased to favour saturation of the RUVBL1-RUVBL2 complex. (B) Cryo-EM field of human R2TP- $\Delta$ TP. (C) 3D classification of the R2TP- $\Delta$ NT images into 5 subgroups. The most abundant class shows density for the RUVBL ring, the DII and RBD domains and PIH1D1. Scale bar represents 5.0 nm (D) Classification of the particles based on the variability of PIH1D1 into 3 subgroups. The most abundant group shows clear density for PIH1D1 and the displaced DII domain, and this was selected for further refinement. Scale bar represents 5 nm. (E) Resolution estimation of R2TP- $\Delta$ NT\_structure2, using FSC and the gold standard as determined in RELION.

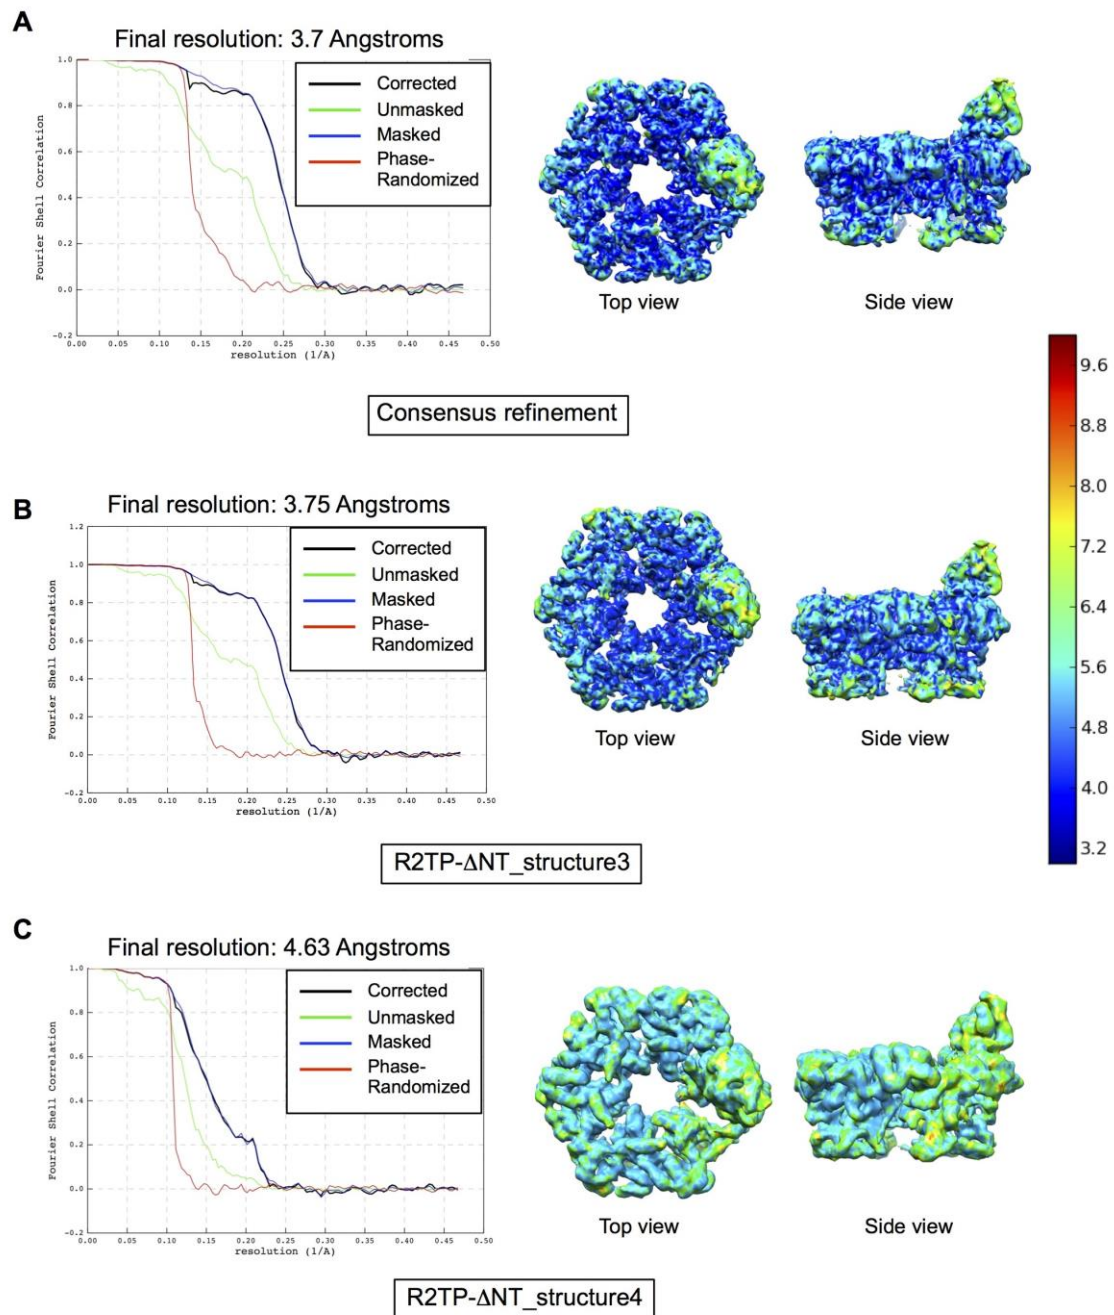

**Fig. S2. Resolution estimation for cryo-EM structures obtained from the subtracted particles.** (A) Resolution estimation of the structure obtained after the consensus refinement of all subtracted particles, using FSC and the gold standard as defined in RELION. Top and side views of the local resolution map are also shown. (B) As in “a” but for the ADP-filled conformation (R2TP-ΔNT\_structure3). (C) As in “a” but for the ADP-empty conformation (R2TP-ΔNT\_structure4).



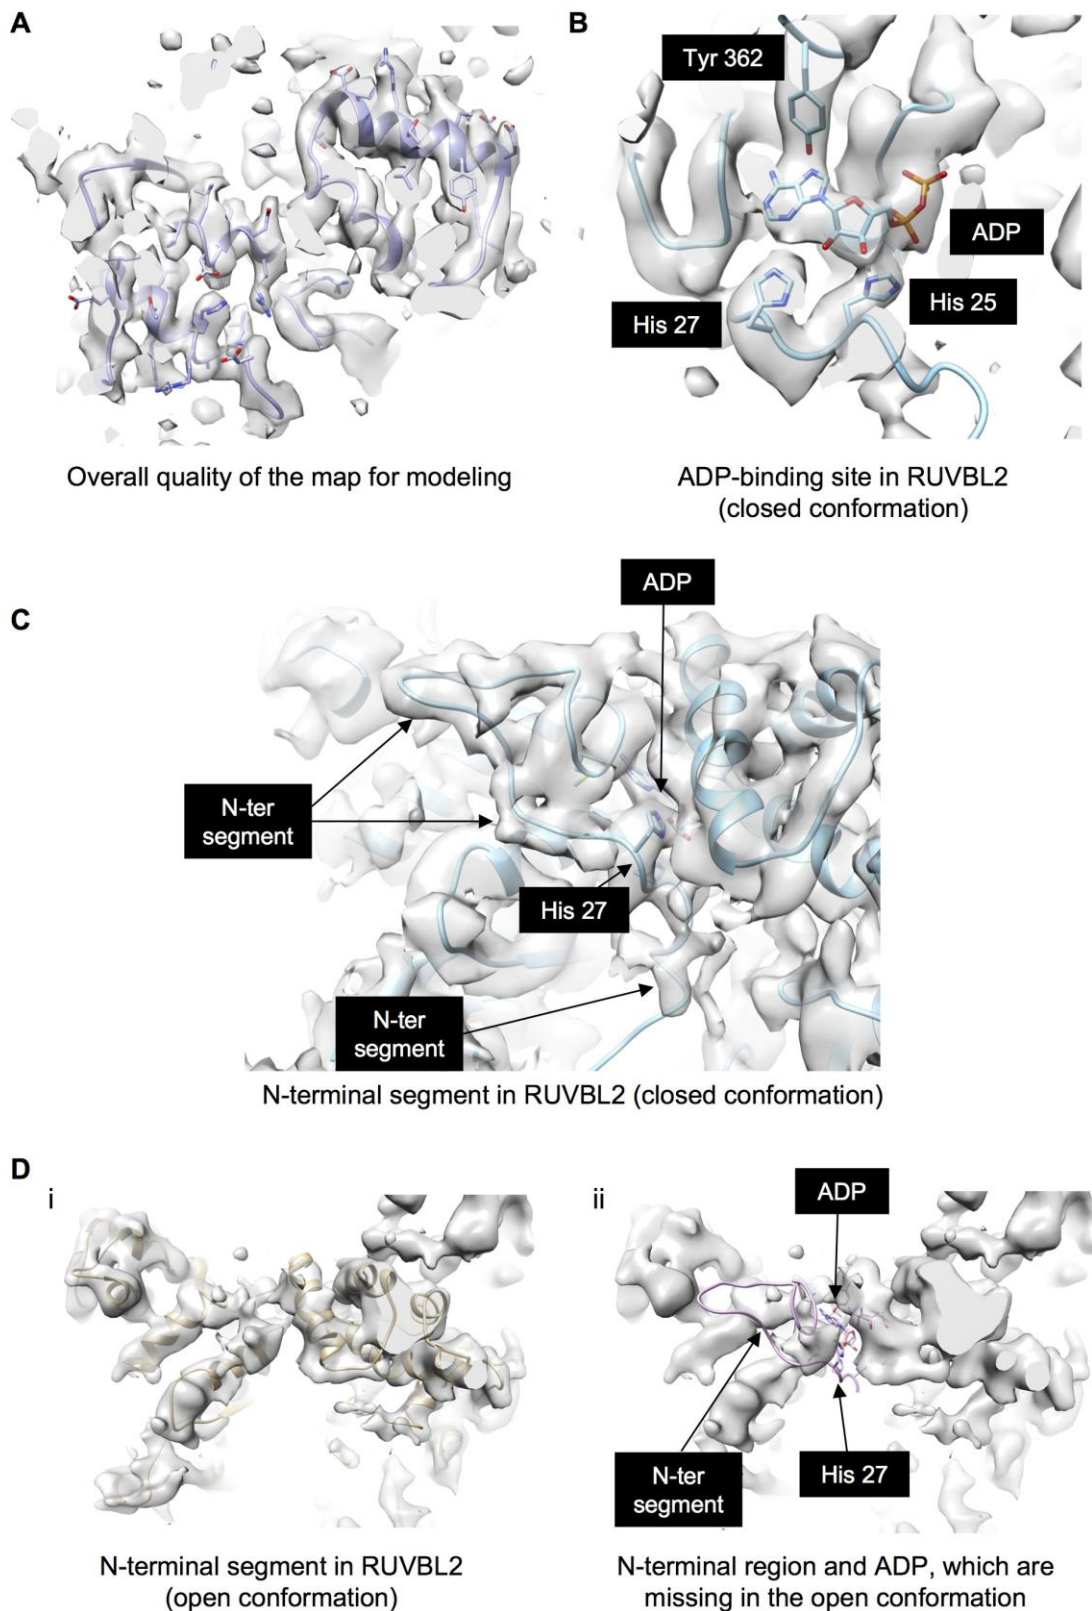

**Fig. S3. High-resolution details in the cryo-EM maps.** (A) View of a region in R2TP- $\Delta$ NT\_structure3 where high-resolution details and density for side chains are clearly

observed. The cryo-EM density is shown as a transparent density where the atomic model is fitted in blue color. **(B)** Close-up view of the cryo-EM density and the model of the ADP-binding site of a RUVBL2 subunit in the closed conformation. Residues His 25, His 27 and Tyr 362 interacting with the ADP are labelled. **(C)** Close-up view of the cryo-EM density and the model of the N-terminal segment of a RUVBL2 subunit in the closed conformation. **(D)** (i). Close-up view of the cryo-EM density and the model of the ADP-binding site of a RUVBL2 subunit in the open conformation. Density for the nucleotide and the whole of the N-terminal segment is missing in the open conformation. (ii) To help comparison, the same region in the cryo-EM map shown in “i” but superimposed with the model for the N-terminal segment of RUVBL2 in the closed conformation (pink colour), to highlight that the open conformation does not show any density for the ADP or the N-terminal segment.

## **SUPPLEMENTARY MOVIES**

**Movie S1. Several views of the multibody refinement strategy, showing the motions of the PIH1D1 region bound to a DII domain of RUVBL2, with respect to the rest of the molecule.** For this analysis, three “bodies” were defined, the RUVBL ring including the RBD domains and the internal part of the DII domains, the external segments of all DII domains except the one attached to PIH1D1, and the unit formed by PIH1D1 and the external part of the DII domain that it contacts.

**Movie S2. Conformational changes in the RUVBL2 subunit, from a closed conformation to an open ADP-filled conformation to an open ADP-empty conformation.** Only the regions conserved between the closed and ADP-empty conformation are shown, and thus, the N-terminal loop and the ADP are not shown. Movie starts from the closed conformation to the open ADP-filled and finally the ADP-empty conformation.
